# Supplementary material
Source: ML conference proceedings conference paper supplement (https://openreview.net/forum?id=fyl82vAale)
Supplement: supplementary_material [file attachment]

## A DATASET STATISTICS AND EXPERIMENTAL SETUPS

**Dataset statistics.** We assess the performance of SOR-Mamba across 13 datasets, with the dataset statistics detailed in Table A.1, where  $C$  and  $T$  denote the number of channels and timesteps, respectively.

**Experimental setups.** We follow the same data processing steps and train-validation-test split protocol as used in S-Mamba (Wang et al., 2024), maintaining a chronological order in the separation of training, validation, and test sets, using a 6:2:2 ratio for the Solar-Energy, ETT, and PEMS datasets, and a 7:1:2 ratio for the other datasets. The results are shown in Table A.1, where  $N, L$ , and  $H$  represent the dataset size, the size of the lookback window, and the size of the forecast horizon, respectively. For all datasets and all models,  $L$  is uniformly set to 96. We do not tune any hyperparameters and adhere to those used in S-Mamba, except for  $\lambda$ , which is related to the proposed regularization, and is tuned using a grid search over  $[0.001, 0.01, 0.1]$ .

| Dataset                         | Statistics |       | Experimental Setups                                   |     |                     |
|---------------------------------|------------|-------|-------------------------------------------------------|-----|---------------------|
|                                 | $C$        | $T$   | $(N_{\text{train}}, N_{\text{val}}, N_{\text{test}})$ | $L$ | $H$                 |
| ETTh1 (Zhou et al., 2021)       | 7          | 17420 | (8545, 2881, 2881)                                    | 96  | {96, 192, 336, 720} |
| ETTh2 (Zhou et al., 2021)       |            | 17420 | (8545, 2881, 2881)                                    |     |                     |
| ETTm1 (Zhou et al., 2021)       |            | 69680 | (34465, 11521, 11521)                                 |     |                     |
| ETTm2 (Zhou et al., 2021)       |            | 69680 | (34465, 11521, 11521)                                 |     |                     |
| Exchange (Wu et al., 2021)      | 8          | 7588  | (5120, 665, 1422)                                     |     |                     |
| Weather (Wu et al., 2021)       | 21         | 52696 | (36792, 5271, 10540)                                  |     |                     |
| ECL (Wu et al., 2021)           | 321        | 26304 | (18317, 2633, 5261)                                   |     |                     |
| Traffic (Wu et al., 2021)       | 862        | 17544 | (12185, 1757, 3509)                                   |     |                     |
| Solar-Energy (Lai et al., 2018) | 137        | 52560 | (36601, 5161, 10417)                                  |     |                     |
| PEMS03 (Liu et al., 2022)       | 358        | 26209 | (15617, 5135, 5135)                                   |     | {12, 24, 48, 96}    |
| PEMS04 (Liu et al., 2022)       | 307        | 15992 | (10172, 3375, 3375)                                   |     |                     |
| PEMS07 (Liu et al., 2022)       | 883        | 28224 | (16911, 5622, 5622)                                   |     |                     |
| PEMS08 (Liu et al., 2022)       | 170        | 17856 | (10690, 3548, 3548)                                   |     |                     |

Table A.1: Datasets for TS forecasting.

## B BASELINE METHODS

- S-Mamba (Wang et al., 2024): S-Mamba utilizes the bidirectional Mamba to capture channel dependencies in TS by scanning the channels from both directions.
- PatchTST (Nie et al., 2023): PatchTST segments TS into patches and feeds them into a Transformer in a channel independent manner.
- iTransformer (Liu et al., 2024a): iTransformer reverses the conventional role of the Transformer in the TS domain by treating each channel rather than patches as a token, thereby emphasizing channel dependencies over temporal dependencies.
- Crossformer (Zhang & Yan, 2023): Crossformer employs a cross-attention mechanism to capture both temporal and channel dependencies in TS.
- TimesNet (Wu et al., 2023): TimesNet captures both intraperiod and interperiod variations in 2D space using a parameter-efficient inception block.
- RLinear (Li et al., 2023): RLinear is a simple linear model that integrates reversible normalization and channel independence.
- DLinear (Zeng et al., 2023): DLinear is a simple linear model with channel independent architecture, that employs TS decomposition.

## C S-MAMBA VS. SOR-MAMBA

Figure C.1 visualizes the comparison between S-Mamba (Wang et al., 2024), which employs the bidirectional Mamba to capture CD, and our method, SOR-Mamba, which uses a single unidirectional Mamba with regularization to capture CD.

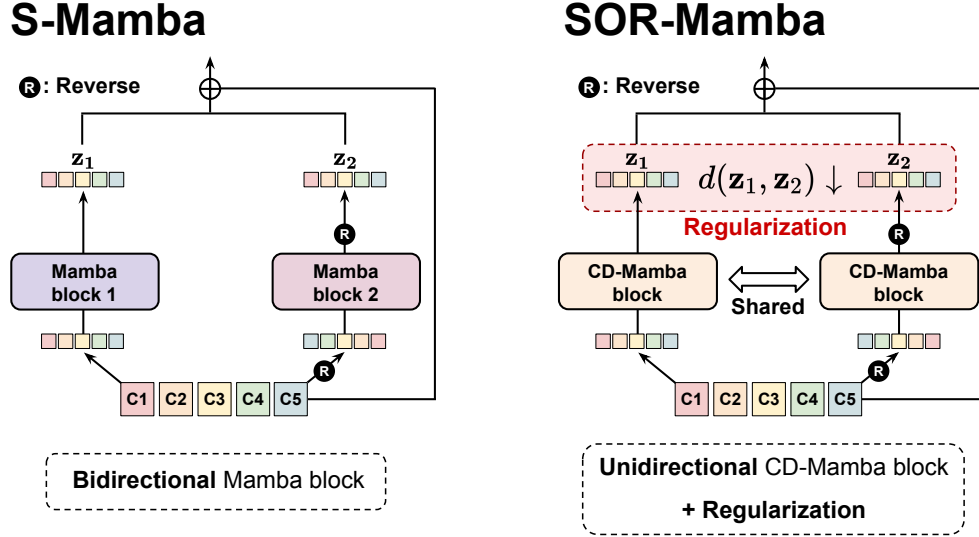

Figure C.1: Comparison of S-Mamba and SOR-Mamba.

## D REMOVAL OF 1D-CONVOLUTION

The original Mamba block (Gu & Dao, 2023) integrates the H3 block (Fu et al., 2023) with a gated MLP, where the H3 block uses a 1D-conv before the SSM layer to capture local information within nearby tokens, as illustrated in Figure D.1. However, since channels in TS do not have an inherent sequential order, we eliminate the 1D-conv from the Mamba block, resulting in the proposed CD-Mamba block. Figure D.2 shows the overall architecture of the proposed CD-Mamba block, where the 1D-conv before the selective SSM is removed from the original Mamba block (Gu & Dao, 2023).

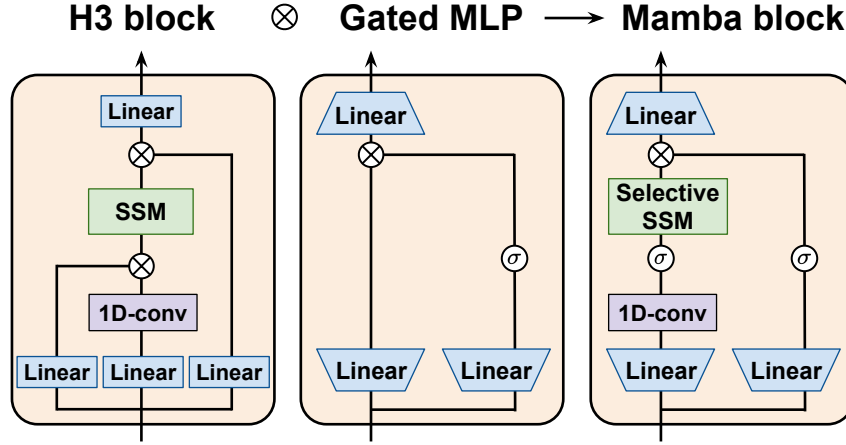

Figure D.1: **Architecture of the original Mamba block.** The original Mamba block contains 1D-conv before the SSM layer to capture local information within nearby tokens.

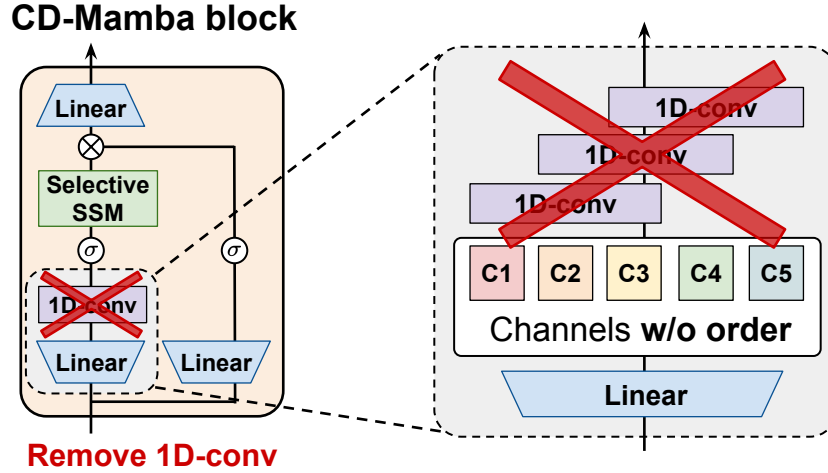

Figure D.2: **Architecture of the CD-Mamba block.** 1D-conv before the selective SSM is removed from the original Mamba block, as the channels do not have a sequential order.

## E FULL RESULTS OF TIME SERIES FORECASTING

Table E.1 shows the full results of TS forecasting tasks across four different horizons, highlighting the effectiveness of our method.

| Models   | SOR-Mamba |            |                 |            | S-Mamba    |            | iTransformer |            | RLinear    |            | PatchTST   |            | Crossformer |            | TiDE  |     | TimesNet |     | DLinear    |            |     |
|----------|-----------|------------|-----------------|------------|------------|------------|--------------|------------|------------|------------|------------|------------|-------------|------------|-------|-----|----------|-----|------------|------------|-----|
|          | FT        |            | SL              |            | MSE        | MAE        | MSE          | MAE        | MSE        | MAE        | MSE        | MAE        | MSE         | MAE        | MSE   | MAE | MSE      | MAE | MSE        | MAE        |     |
| Metric   | MSE       | MAE        | MSE             | MAE        | MSE        | MAE        | MSE          | MAE        | MSE        | MAE        | MSE        | MAE        | MSE         | MAE        | MSE   | MAE | MSE      | MAE | MSE        | MAE        |     |
| ETTh1    | 96        | <u>377</u> | <u>398</u>      | <u>385</u> | <u>398</u> | <u>385</u> | 404          | 387        | 405        | 386        | <u>395</u> | 414        | 419         | 423        | 448   | 479 | 464      | 384 | 402        | 386        | 400 |
|          | 192       | <u>428</u> | <u>429</u>      | <u>435</u> | <u>428</u> | <u>445</u> | 441          | 441        | 436        | 437        | <u>424</u> | 460        | 445         | 471        | 474   | 525 | 492      | 436 | 429        | 437        | 432 |
|          | 336       | <u>464</u> | <u>448</u>      | <u>474</u> | <u>448</u> | 491        | 462          | 487        | 458        | 479        | <u>446</u> | 501        | 466         | 570        | 546   | 565 | 515      | 491 | 469        | 481        | 459 |
|          | 720       | <u>464</u> | <u>469</u>      | <u>478</u> | <u>471</u> | 506        | 497          | 509        | 494        | 481        | <u>470</u> | 500        | 488         | 653        | 621   | 594 | 558      | 521 | 500        | 519        | 516 |
|          | Avg.      | <u>433</u> | <u>436</u>      | <u>442</u> | 438        | 457        | 452          | 457        | 449        | 446        | <u>434</u> | 469        | 454         | 529        | 522   | 541 | 507      | 458 | 450        | 456        | 452 |
| ETTh2    | 96        | <u>292</u> | <u>348</u>      | 299        | <u>348</u> | 297        | 349          | 301        | 350        | <u>288</u> | <u>338</u> | 302        | <u>348</u>  | 745        | 584   | 400 | 440      | 340 | 374        | 333        | 387 |
|          | 192       | <u>372</u> | <u>397</u>      | 375        | 399        | 378        | 399          | 381        | 399        | <u>374</u> | <u>390</u> | 388        | 400         | 877        | 656   | 528 | 509      | 402 | 414        | 477        | 476 |
|          | 336       | <u>415</u> | <u>431</u>      | <u>423</u> | 435        | 425        | 435          | 427        | 434        | <u>415</u> | <u>426</u> | 426        | 433         | 1.043      | 731   | 643 | 571      | 452 | 452        | 594        | 541 |
|          | 720       | <u>423</u> | <u>445</u>      | 431        | 446        | 432        | 448          | 430        | 446        | <u>420</u> | <u>440</u> | 431        | 446         | 1.104      | 763   | 874 | 679      | 462 | 468        | 831        | 657 |
|          | Avg.      | <u>376</u> | <u>405</u>      | 382        | 407        | 383        | 408          | 384        | 407        | <u>374</u> | <u>398</u> | 387        | 407         | 942        | 684   | 611 | 550      | 414 | 427        | 559        | 515 |
| ETTm1    | 96        | <u>324</u> | <u>362</u>      | <u>326</u> | <u>367</u> | <u>326</u> | 368          | 342        | 377        | 355        | 376        | 329        | <u>367</u>  | 404        | 426   | 364 | 387      | 338 | 375        | 345        | 372 |
|          | 192       | <u>369</u> | <u>385</u>      | 375        | <u>387</u> | 378        | 393          | 383        | 396        | 391        | 392        | <u>367</u> | <u>385</u>  | 450        | 451   | 398 | 404      | 374 | <u>387</u> | 380        | 389 |
|          | 336       | <u>402</u> | <u>408</u>      | 408        | <u>408</u> | 410        | 414          | 418        | 418        | 424        | 415        | <u>399</u> | <u>410</u>  | 532        | 515   | 428 | 425      | 410 | 411        | 413        | 413 |
|          | 720       | <u>467</u> | <u>444</u>      | 472        | <u>444</u> | 474        | 451          | 487        | 456        | 487        | <u>450</u> | <u>454</u> | <u>439</u>  | 666        | 589   | 487 | 461      | 478 | 450        | 474        | 453 |
|          | Avg.      | <u>391</u> | <u>400</u>      | 396        | <u>401</u> | 398        | 407          | 408        | 412        | 414        | 407        | <u>387</u> | <u>400</u>  | 513        | 496   | 419 | 419      | 400 | 406        | 403        | 407 |
| ETTm2    | 96        | <u>179</u> | <u>261</u>      | 181        | 265        | 182        | 266          | 186        | 272        | 182        | 265        | <u>175</u> | <u>259</u>  | 287        | 366   | 207 | 305      | 187 | 267        | 193        | 292 |
|          | 192       | <u>241</u> | <u>304</u>      | <u>246</u> | 307        | 252        | 313          | 254        | 314        | <u>246</u> | <u>304</u> | <u>241</u> | <u>302</u>  | 414        | 492   | 290 | 364      | 249 | 309        | 284        | 362 |
|          | 336       | <u>302</u> | <u>342</u>      | 306        | 345        | 313        | 349          | 317        | 353        | 307        | <u>342</u> | <u>305</u> | <u>343</u>  | 597        | 542   | 377 | 422      | 321 | 351        | 369        | 427 |
|          | 720       | <u>401</u> | <u>400</u>      | 403        | 401        | 416        | 409          | 412        | 407        | <u>398</u> | <u>402</u> | <u>400</u> | 1.730       | 1.042      | 558   | 524 | 408      | 403 | 554        | 522        |     |
|          | Avg.      | <u>281</u> | <u>327</u>      | <u>284</u> | 329        | 290        | 333          | 293        | 337        | 286        | <u>327</u> | <u>281</u> | <u>326</u>  | 757        | 610   | 358 | 404      | 291 | 333        | 350        | 401 |
| PEMS03   | 12        | <u>066</u> | <u>170</u>      | <u>066</u> | <u>170</u> | <u>066</u> | <u>171</u>   | 071        | 174        | 126        | 236        | 099        | 216         | 090        | 203   | 178 | 305      | 085 | 192        | 122        | 243 |
|          | 24        | <u>088</u> | <u>197</u>      | <u>090</u> | <u>200</u> | <u>088</u> | <u>197</u>   | 097        | 208        | 246        | 334        | 142        | 259         | 121        | 240   | 257 | 371      | 118 | 223        | 201        | 317 |
|          | 48        | <u>134</u> | <u>245</u>      | 167        | 280        | 165        | 277          | <u>161</u> | <u>272</u> | 551        | 529        | 211        | 319         | 202        | 317   | 379 | 463      | 155 | 260        | 333        | 425 |
|          | 96        | <u>193</u> | <u>297</u>      | 225        | 318        | <u>213</u> | <u>313</u>   | 240        | 338        | 1.057      | 787        | 269        | 370         | 262        | 367   | 490 | 539      | 228 | 317        | 457        | 515 |
|          | Avg.      | <u>121</u> | <u>227</u>      | 137        | 242        | <u>133</u> | <u>240</u>   | 142        | 248        | 495        | 472        | 180        | 291         | 169        | 281   | 326 | 419      | 147 | 248        | 278        | 375 |
| PEMS04   | 12        | <u>074</u> | <u>175</u>      | 077        | 180        | <u>073</u> | <u>177</u>   | 081        | 188        | 138        | 252        | 105        | 224         | 098        | 218   | 219 | 340      | 087 | 195        | 148        | 272 |
|          | 24        | <u>086</u> | <u>192</u>      | 091        | <u>197</u> | <u>084</u> | <u>192</u>   | 099        | 211        | 258        | 348        | 153        | 275         | 131        | 256   | 292 | 398      | 103 | 215        | 224        | 340 |
|          | 48        | <u>106</u> | <u>214</u>      | 115        | 221        | 101        | <u>213</u>   | 133        | 246        | 572        | 544        | 229        | 339         | 205        | 326   | 409 | 478      | 136 | 250        | 355        | 437 |
|          | 96        | <u>129</u> | <u>233</u>      | 143        | 248        | <u>125</u> | <u>236</u>   | 172        | 283        | 1.137      | 820        | 291        | 389         | 402        | 457   | 492 | 532      | 190 | 303        | 452        | 504 |
|          | Avg.      | <u>099</u> | <u>203</u>      | 107        | 212        | <u>096</u> | <u>205</u>   | 121        | 232        | 526        | 491        | 195        | 307         | 209        | 314   | 353 | 437      | 129 | 241        | 295        | 388 |
| PEMS07   | 12        | <u>059</u> | <u>155</u>      | <u>060</u> | <u>156</u> | <u>060</u> | 157          | 067        | 165        | 118        | 235        | 095        | 207         | 094        | 200   | 173 | 304      | 082 | 181        | 115        | 242 |
|          | 24        | <u>076</u> | <u>174</u>      | <u>082</u> | <u>182</u> | <u>082</u> | 184          | 088        | 190        | 242        | 341        | 150        | 262         | 139        | 247   | 271 | 383      | 101 | 204        | 210        | 329 |
|          | 48        | <u>098</u> | <u>199</u>      | 107        | 209        | <u>100</u> | <u>204</u>   | 113        | 218        | 562        | 541        | 253        | 340         | 311        | 369   | 446 | 495      | 134 | 238        | 398        | 458 |
|          | 96        | <u>117</u> | <u>218</u>      | 117        | <u>218</u> | <u>117</u> | <u>218</u>   | 172        | 283        | 1.096      | 795        | 346        | 404         | 396        | 442   | 628 | 577      | 181 | 279        | 594        | 553 |
|          | Avg.      | <u>088</u> | <u>186</u>      | 091        | <u>191</u> | <u>090</u> | <u>191</u>   | 102        | 205        | 504        | 478        | 211        | 303         | 235        | 315   | 380 | 440      | 124 | 225        | 329        | 395 |
| PEMS08   | 12        | <u>078</u> | <u>178</u>      | <u>076</u> | <u>176</u> | <u>076</u> | <u>178</u>   | 088        | 193        | 133        | 247        | 168        | 232         | 165        | 214   | 227 | 343      | 112 | 212        | 154        | 276 |
|          | 24        | <u>103</u> | <u>205</u>      | 109        | <u>212</u> | 110        | 216          | 138        | 243        | 249        | 343        | 224        | 281         | 215        | 260   | 318 | 409      | 141 | 238        | 248        | 353 |
|          | 48        | <u>159</u> | <u>250</u>      | <u>172</u> | 264        | 173        | <u>254</u>   | 334        | 353        | 569        | 544        | 321        | 354         | 315        | 355   | 497 | 510      | 198 | 283        | 440        | 470 |
|          | 96        | <u>229</u> | <u>295</u>      | 290        | 334        | <u>271</u> | <u>321</u>   | 458        | 436        | 1.166      | 814        | 408        | 417         | 377        | 397   | 721 | 592      | 320 | 351        | 674        | 565 |
|          | Avg.      | <u>142</u> | <u>232</u>      | 162        | 247        | <u>157</u> | <u>242</u>   | 254        | 306        | 529        | 487        | 280        | 321         | 268        | 307   | 441 | 464      | 193 | 271        | 379        | 416 |
| Exchange | 96        | <u>085</u> | <u>204</u>      | <u>085</u> | <u>205</u> | <u>086</u> | 206          | <u>086</u> | 206        | 093        | 217        | 088        | <u>205</u>  | 256        | 367   | 094 | 218      | 107 | 234        | 088        | 218 |
|          | 192       | 179        | <u>301</u>      | 179        | <u>301</u> | 181        | 303          | 177        | <u>299</u> | 184        | 307        | <u>176</u> | <u>299</u>  | 470        | 509   | 184 | 307      | 226 | 344        | <u>176</u> | 315 |
|          | 336       | 329        | <u>415</u>      | 331        | 417        | 331        | 417          | 338        | 422        | 351        | 432        | <u>301</u> | <u>397</u>  | 1.268      | 883   | 349 | 431      | 367 | 448        | <u>313</u> | 427 |
|          | 720       | <u>838</u> | <u>690</u>      | 860        | 698        | 858        | <u>599</u>   | 847        | 691        | 886        | 714        | 901        | 714         | 1.767      | 1.068 | 852 | 698      | 964 | 746        | <u>839</u> | 695 |
|          | Avg.      | <u>358</u> | <u>402</u>      | 363        | 405        | 364        | 407          | 368        | 409        | 378        | 417        | 367        | <u>404</u>  | 940        | 707   | 370 | 413      | 416 | 443        | <u>354</u> | 414 |
| Weather  | 96        | 174        | <u>212</u>      | 175        | 215        | <u>165</u> | <u>209</u>   | 174        | 215        | 192        | 232        | 177        | 218         | <u>158</u> | 230   | 202 | 261      | 172 | 220        | 196        | 255 |
|          | 192       | 221        | <u>255</u>      | 221        | <u>255</u> | <u>215</u> | <u>255</u>   | 224        | <u>258</u> | 240        | 271        | 225        | 259         | <u>206</u> | 277   | 242 | 298      | 219 | 261        | 237        | 296 |
|          | 336       | <u>277</u> | <u>295</u>      | <u>277</u> | <u>296</u> | <u>273</u> | <u>296</u>   | 281        | 298        | 292        | 307        | 278        | 297         | <u>273</u> | 335   | 287 | 335      | 280 | 306        | 283        | 335 |
|          | 720       | <u>353</u> | <u>348</u>      | 355        | <u>348</u> | <u>353</u> | <u>349</u>   | 359        | 351        | 364        | 353        | <u>354</u> | <u>348</u>  | 398        | 418   | 351 | 386      | 365 | 359        | <u>345</u> | 381 |
|          | Avg.      | <u>256</u> | <u>277</u>      | 257        | <u>278</u> | <u>252</u> | <u>277</u>   | 260        | 281        | 272        | 291        | 259        | 281         | 259        | 315   | 271 | 320      | 259 | 287        | 265        | 317 |
| Solar    | 96        | <u>194</u> | <u>229</u>      | 207        | 246        | 207        | 246          | 201        | <u>234</u> | 322        | 339        | 234        | 286         | 310        | 331   | 312 | 399      | 250 | 292        | 290        | 378 |
|          | 192       | <u>228</u> | <u>256</u>      | 239        | 270        | 240        | 272          | <u>238</u> | <u>261</u> | 359        | 356        | 267        | 310         | 734        | 725   | 339 | 416      | 296 | 318        | 320        | 398 |
|          | 336       | <u>247</u> | <u>276</u>      | 260        | 287        | 262        | 290          | <u>248</u> | <u>273</u> | 397        | 369        | 290        | 315         | 750        | 735   | 368 | 430      | 319 | 330        | 353        | 415 |
|          | 720       | <u>251</u> | <u>275</u>      | 264        | <u>291</u> | 267        | 293          | <u>249</u> | <u>275</u> | 397        | 356        | 289        | 317         | 769        | 765   | 370 | 425      | 338 | 337        | 356        | 413 |
|          | Avg.      | <u>230</u> | <u>259</u>      | 242        | 274        | 244        | 275          | <u>234</u> | <u>261</u> | 369        | 356        | 270        | 307         | 641        | 639   | 347 | 417      | 301 | 319        | 330        | 401 |
| ECL      | 96        | <u>139</u> | <u>235</u>      | <u>139</u> | <u>233</u> | <u>139</u> | 237          | <u>148</u> | 240        | 201        | 281        | 181        | 270         | 219        | 314   | 237 | 329      | 168 | 272        | 197        | 282 |
|          | 192       | <u>160</u> | <u>254</u>      | <u>158</u> | <u>249</u> | 165        | 261          | 167        | 258        | 201        | 283        | 188        | 274         | 231        | 322   | 236 | 330      | 184 | 289        | 196        | 285 |
|          | 336       | <u>176</u> | <u>271</u>      | <u>177</u> | <u>271</u> | 177        | 274          | 179        | <u>272</u> | 215        | 298        | 204        | 293         | 246        | 337   | 249 | 344      | 198 | 300        | 209        | 301 |
|          | 720       | <u>198</u> | <u>292&lt;/</u> |            |            |            |              |            |            |            |            |            |             |            |       |     |          |     |            |            |     |

## F ABLATION STUDY

To demonstrate the effectiveness of our method, we conduct an ablation study using four ETT datasets (Zhou et al., 2021) to assess the impact of the following components, where the results are shown in Table F.1. The results indicate that incorporating all components yields the best performance, and adding the regularization term enhances the performance even with the bidirectional Mamba.

| Method    | Mamba |           | Reg. | CCM | ETTh1       | ETTh2       | ETTm1       | ETTm2       | Avg.        |
|-----------|-------|-----------|------|-----|-------------|-------------|-------------|-------------|-------------|
|           | #     | w/o conv. |      |     |             |             |             |             |             |
| S-Mamba   | Bi    | -         | -    | -   | .457        | .383        | .398        | .290        | .382        |
| -         | Bi    | ✓         | -    | -   | .441        | .383        | .396        | .285        | .376        |
| -         | Bi    | -         | ✓    | -   | .452        | .382        | .394        | .286        | .378        |
| -         | Bi    | ✓         | ✓    | -   | .443        | <u>.381</u> | .393        | .285        | <u>.376</u> |
| -         | Bi    | ✓         | ✓    | ✓   | <u>.435</u> | <u>.376</u> | <u>.390</u> | <u>.281</u> | <u>.370</u> |
| -         | Uni   | -         | -    | -   | .455        | .383        | .403        | .289        | .383        |
| -         | Uni   | ✓         | -    | -   | .442        | .382        | .400        | .285        | .377        |
| -         | Uni   | -         | ✓    | -   | .449        | .382        | .396        | .285        | .378        |
| -         | Uni   | ✓         | ✓    | -   | .442        | .382        | .396        | <u>.284</u> | <u>.376</u> |
| SOR-Mamba | Uni   | ✓         | ✓    | ✓   | <u>.433</u> | <u>.376</u> | <u>.391</u> | <u>.281</u> | <u>.370</u> |

Table F.1: Ablation studies with four ETT datasets.

## G CHANNEL ORDERS FOR TWO VIEWS

Figure G.1 illustrates the four candidates for generating two embedding vectors,  $\mathbf{z}_1$  and  $\mathbf{z}_2$ , for regularization, based on whether the channel order is fixed or randomly permuted in each iteration. Results in Table 12 indicate that fixing the order during training yields the best performance, with performance degrading as the order becomes random, especially with many channels, though it remains robust with fewer channels. We argue that a fixed order is preferable due to the instability introduced by randomness during training, as shown in Figure G.1, which displays the training loss for two datasets (Zhou et al., 2021; Liu et al., 2022) with varying numbers of channels. The figure indicates that a random order causes instability, particularly with the regularization loss.

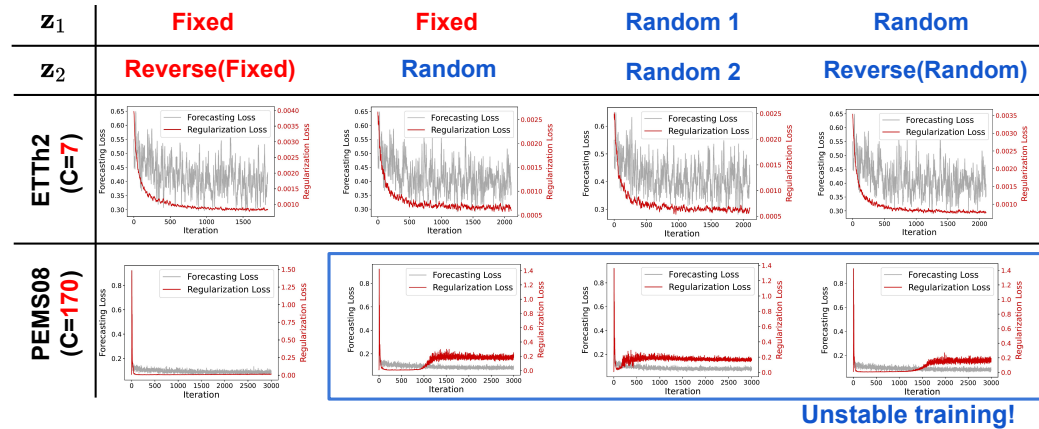

Figure G.1: Fixed vs. random order for generating two views,  $\mathbf{z}_1$  and  $\mathbf{z}_2$ .

## H ROBUSTNESS TO CHANNEL ORDER

To demonstrate that the proposed method effectively addresses the sequential order bias, we evaluate performance variations by permuting the channel order with five datasets (Zhou et al., 2021; Wu et al., 2021). Table H.1 shows the results, which indicate a small standard deviation across all horizons.

| $H$  | ETTh1            | ETTh2            | ETTm1            | ETTm2            | Exchange         |
|------|------------------|------------------|------------------|------------------|------------------|
| 96   | .377 $\pm$ .0003 | .292 $\pm$ .0011 | .324 $\pm$ .0005 | .179 $\pm$ .0003 | .085 $\pm$ .0001 |
| 192  | .428 $\pm$ .0002 | .372 $\pm$ .0000 | .369 $\pm$ .0005 | .241 $\pm$ .0002 | .179 $\pm$ .0001 |
| 336  | .464 $\pm$ .0002 | .415 $\pm$ .0002 | .402 $\pm$ .0003 | .302 $\pm$ .0001 | .329 $\pm$ .0002 |
| 720  | .464 $\pm$ .0004 | .423 $\pm$ .0001 | .467 $\pm$ .0009 | .401 $\pm$ .0001 | .838 $\pm$ .0014 |
| Avg. | .434 $\pm$ .0002 | .423 $\pm$ .0003 | .391 $\pm$ .0001 | .281 $\pm$ .0001 | .358 $\pm$ .0003 |

Table H.1: Robustness to channel order.

## I ROBUSTNESS TO HYPERPARAMETER $\lambda$

Table I.1 shows the average MSE across four different horizons for the four ETT datasets (Zhou et al., 2021), using various values of  $\lambda$  that control the contribution of the regularization term. The results demonstrate the effectiveness of the regularization and its robustness to  $\lambda$ .

| Dataset | SOR-Mamba            |             |             |             |             | S-Mamba              |
|---------|----------------------|-------------|-------------|-------------|-------------|----------------------|
|         | w/o Reg.             | w/ Reg.     |             |             |             |                      |
|         | 0                    | 0.001       | 0.01        | 0.1         | 0.2         |                      |
| ETTh1   | <a href="#">.439</a> | <b>.433</b> | <b>.433</b> | <b>.433</b> | <b>.433</b> | .457                 |
| ETTh2   | <a href="#">.382</a> | <b>.376</b> | <b>.376</b> | <b>.376</b> | <b>.376</b> | .383                 |
| ETTm1   | .403                 | <b>.391</b> | <b>.391</b> | <b>.391</b> | <b>.391</b> | <a href="#">.398</a> |
| ETTm2   | <a href="#">.285</a> | <b>.281</b> | <b>.281</b> | <b>.281</b> | <b>.281</b> | .290                 |

Table I.1: Robustness to choice of  $\lambda$  for regularization.

## J ROBUSTNESS TO DISTANCE METRIC

To assess whether SOR-Mamba is sensitive to the choice of distance metric  $d$  for the regularization term and CCM when comparing the two matrices, we compare various metrics, including (negative) cosine similarity,  $\ell_1$  loss, and  $\ell_2$  loss. Tables J.1 and J.2 show the average MSE across four different horizons for the distance metric used in the regularization term and CCM, respectively, demonstrating that the performance is robust to the choice of distance metric, where we choose  $\ell_2$  loss throughout the experiment for both metrics.

| Dataset  | SOR-Mamba-SL |               |               | S-Mamba     |
|----------|--------------|---------------|---------------|-------------|
|          | Cosine       | $\ell_1$ Loss | $\ell_2$ Loss |             |
| ETTh1    | <b>.442</b>  | <b>.442</b>   | <b>.442</b>   | <u>.457</u> |
| ETTh2    | <b>.382</b>  | <b>.382</b>   | <b>.382</b>   | <u>.383</u> |
| ETTm1    | <b>.396</b>  | <b>.396</b>   | <b>.396</b>   | <u>.398</u> |
| ETTm2    | <b>.284</b>  | <b>.284</b>   | <b>.284</b>   | <u>.290</u> |
| PEMS03   | .145         | .147          | <u>.137</u>   | <b>.133</b> |
| PEMS04   | <u>.105</u>  | <u>.105</u>   | .107          | <b>.096</b> |
| PEMS07   | <u>.091</u>  | <u>.091</u>   | <u>.091</u>   | <b>.090</b> |
| PEMS08   | .162         | <u>.159</u>   | .162          | <b>.157</b> |
| Exchange | .365         | .365          | <b>.363</b>   | <u>.364</u> |
| Weather  | <u>.256</u>  | .257          | .257          | <b>.252</b> |
| Solar    | <b>.242</b>  | <b>.242</b>   | <b>.242</b>   | <u>.244</u> |
| ECL      | <b>.167</b>  | <u>.168</u>   | .169          | .174        |
| Traffic  | <u>.414</u>  | <u>.414</u>   | <b>.412</b>   | .417        |
| Average  | <b>.265</b>  | <b>.265</b>   | <b>.265</b>   | <u>.266</u> |

Table J.1: Robustness to  $d$  for regularization.

| Dataset  | SOR-Mamba-SSL |               | S-Mamba     |
|----------|---------------|---------------|-------------|
|          | $\ell_1$ Loss | $\ell_2$ Loss |             |
| ETTh1    | <u>.434</u>   | <b>.433</b>   | .457        |
| ETTh2    | <u>.379</u>   | <b>.376</b>   | .383        |
| ETTm1    | <b>.391</b>   | <b>.391</b>   | <u>.398</u> |
| ETTm2    | <b>.281</b>   | <b>.281</b>   | <u>.290</u> |
| PEMS03   | <b>.121</b>   | <b>.121</b>   | <u>.133</u> |
| PEMS04   | <u>.099</u>   | <u>.099</u>   | <b>.096</b> |
| PEMS07   | <u>.089</u>   | <b>.088</b>   | .090        |
| PEMS08   | <b>.140</b>   | <u>.142</u>   | .157        |
| Exchange | <b>.358</b>   | <b>.358</b>   | <u>.364</u> |
| Weather  | <u>.256</u>   | <u>.256</u>   | <b>.252</b> |
| Solar    | <u>.232</u>   | <b>.230</b>   | .244        |
| ECL      | <b>.167</b>   | <u>.168</u>   | .174        |
| Traffic  | <b>.402</b>   | <b>.402</b>   | <u>.417</u> |
| Average  | <u>.258</u>   | <b>.257</b>   | .266        |

Table J.2: Robustness to  $d$  for CCM.

## K COMPARISON OF GPU MEMORY USAGE

Figure K.1 visualizes GPU memory usage by dataset and method, demonstrating that our method is more efficient than both S-Mamba (Wang et al., 2024) and iTransformer (Liu et al., 2024a). Specifically, Mamba-based methods are more efficient than Transformer-based methods when  $C$  is large, as Mamba has nearly-linear complexity, whereas Transformers have quadratic complexity.

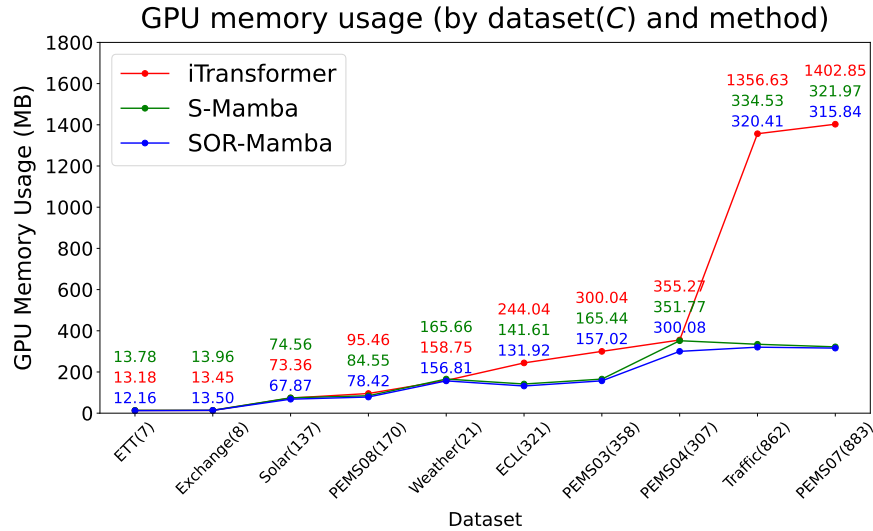

Figure K.1: Comparison of GPU memory usage.

## L STATISTICS OF RESULTS OVER MULTIPLE RUNS

To assess the consistency of SOR-Mamba’s performance, we present the statistics from results using five different random seeds. We calculate the mean and standard deviation for both MSE and MAE, detailed in Tables L.1, L.2, and L.3. which reveal that our method maintains consistent performance in both self-supervised and supervised settings.

| Models |      | Ours            |                 |                 |                 |
|--------|------|-----------------|-----------------|-----------------|-----------------|
|        |      | FT              |                 | SL              |                 |
| Metric |      | MSE             | MAE             | MSE             | MAE             |
| ETTh1  | 96   | .377 $\pm$ .001 | .398 $\pm$ .001 | .385 $\pm$ .000 | .398 $\pm$ .000 |
|        | 192  | .428 $\pm$ .001 | .429 $\pm$ .000 | .432 $\pm$ .001 | .428 $\pm$ .000 |
|        | 336  | .464 $\pm$ .001 | .448 $\pm$ .001 | .476 $\pm$ .000 | .448 $\pm$ .000 |
|        | 720  | .464 $\pm$ .001 | .469 $\pm$ .006 | .476 $\pm$ .003 | .476 $\pm$ .002 |
|        | Avg. | .433 $\pm$ .000 | .436 $\pm$ .002 | .442 $\pm$ .001 | .438 $\pm$ .000 |
|        |      |                 |                 |                 |                 |
| ETTh2  | 96   | .292 $\pm$ .004 | .348 $\pm$ .003 | .299 $\pm$ .001 | .348 $\pm$ .001 |
|        | 192  | .372 $\pm$ .001 | .397 $\pm$ .001 | .375 $\pm$ .001 | .399 $\pm$ .001 |
|        | 336  | .415 $\pm$ .001 | .431 $\pm$ .000 | .423 $\pm$ .000 | .435 $\pm$ .000 |
|        | 720  | .423 $\pm$ .001 | .445 $\pm$ .001 | .431 $\pm$ .002 | .446 $\pm$ .001 |
|        | Avg. | .376 $\pm$ .001 | .405 $\pm$ .001 | .382 $\pm$ .001 | .407 $\pm$ .000 |
|        |      |                 |                 |                 |                 |
| ETTm1  | 96   | .324 $\pm$ .002 | .362 $\pm$ .002 | .324 $\pm$ .004 | .367 $\pm$ .003 |
|        | 192  | .369 $\pm$ .002 | .385 $\pm$ .001 | .375 $\pm$ .002 | .387 $\pm$ .001 |
|        | 336  | .402 $\pm$ .002 | .408 $\pm$ .001 | .408 $\pm$ .000 | .408 $\pm$ .000 |
|        | 720  | .467 $\pm$ .002 | .444 $\pm$ .001 | .472 $\pm$ .001 | .444 $\pm$ .001 |
|        | Avg. | .391 $\pm$ .001 | .400 $\pm$ .001 | .396 $\pm$ .001 | .401 $\pm$ .001 |
|        |      |                 |                 |                 |                 |
| ETTm2  | 96   | .179 $\pm$ .001 | .261 $\pm$ .001 | .181 $\pm$ .000 | .265 $\pm$ .000 |
|        | 192  | .241 $\pm$ .000 | .304 $\pm$ .000 | .246 $\pm$ .001 | .307 $\pm$ .001 |
|        | 336  | .302 $\pm$ .002 | .342 $\pm$ .002 | .306 $\pm$ .001 | .345 $\pm$ .000 |
|        | 720  | .401 $\pm$ .002 | .400 $\pm$ .002 | .403 $\pm$ .002 | .401 $\pm$ .001 |
|        | Avg. | .281 $\pm$ .001 | .327 $\pm$ .000 | .284 $\pm$ .001 | .329 $\pm$ .000 |
|        |      |                 |                 |                 |                 |

Table L.1: Results of TS forecasting over five runs - 1) ETT datasets.

+



| Models |      | Ours            |                 |                 |                 |
|--------|------|-----------------|-----------------|-----------------|-----------------|
|        |      | FT              |                 | SL              |                 |
| Metric |      | MSE             | MAE             | MSE             | MAE             |
| PEMS03 | 12   | .066 $\pm$ .001 | .170 $\pm$ .001 | .066 $\pm$ .001 | .170 $\pm$ .001 |
|        | 24   | .088 $\pm$ .001 | .197 $\pm$ .001 | .090 $\pm$ .001 | .200 $\pm$ .001 |
|        | 48   | .134 $\pm$ .002 | .245 $\pm$ .003 | .167 $\pm$ .001 | .280 $\pm$ .001 |
|        | 96   | .193 $\pm$ .005 | .297 $\pm$ .006 | .225 $\pm$ .003 | .318 $\pm$ .002 |
|        | Avg. | .121 $\pm$ .002 | .227 $\pm$ .002 | .137 $\pm$ .001 | .242 $\pm$ .001 |
| PEMS04 | 12   | .074 $\pm$ .002 | .175 $\pm$ .003 | .077 $\pm$ .000 | .180 $\pm$ .000 |
|        | 24   | .086 $\pm$ .003 | .192 $\pm$ .005 | .091 $\pm$ .001 | .197 $\pm$ .001 |
|        | 48   | .106 $\pm$ .001 | .214 $\pm$ .005 | .115 $\pm$ .002 | .221 $\pm$ .003 |
|        | 96   | .129 $\pm$ .003 | .233 $\pm$ .004 | .143 $\pm$ .002 | .248 $\pm$ .002 |
|        | Avg. | .099 $\pm$ .001 | .203 $\pm$ .002 | .107 $\pm$ .001 | .212 $\pm$ .001 |
| PEMS07 | 12   | .059 $\pm$ .001 | .155 $\pm$ .001 | .060 $\pm$ .000 | .156 $\pm$ .000 |
|        | 24   | .076 $\pm$ .005 | .174 $\pm$ .004 | .082 $\pm$ .000 | .182 $\pm$ .000 |
|        | 48   | .098 $\pm$ .001 | .199 $\pm$ .001 | .107 $\pm$ .001 | .209 $\pm$ .000 |
|        | 96   | .117 $\pm$ .003 | .218 $\pm$ .003 | .117 $\pm$ .001 | .218 $\pm$ .001 |
|        | Avg. | .088 $\pm$ .001 | .186 $\pm$ .001 | .091 $\pm$ .000 | .191 $\pm$ .000 |
| PEMS08 | 12   | .078 $\pm$ .000 | .178 $\pm$ .000 | .076 $\pm$ .001 | .176 $\pm$ .000 |
|        | 24   | .103 $\pm$ .001 | .205 $\pm$ .002 | .109 $\pm$ .001 | .212 $\pm$ .001 |
|        | 48   | .159 $\pm$ .001 | .250 $\pm$ .001 | .172 $\pm$ .003 | .264 $\pm$ .003 |
|        | 96   | .229 $\pm$ .001 | .295 $\pm$ .002 | .290 $\pm$ .002 | .334 $\pm$ .002 |
|        | Avg. | .142 $\pm$ .000 | .232 $\pm$ .001 | .162 $\pm$ .001 | .247 $\pm$ .001 |

Table L.2: Results of TS forecasting over five runs - 2) PEMS datasets.

| Models   |      | Ours            |                 |                 |                 |
|----------|------|-----------------|-----------------|-----------------|-----------------|
|          |      | FT              |                 | SL              |                 |
| Metric   |      | MSE             | MAE             | MSE             | MAE             |
| Exchange | 96   | .085 $\pm$ .001 | .204 $\pm$ .002 | .085 $\pm$ .001 | .205 $\pm$ .001 |
|          | 192  | .179 $\pm$ .000 | .301 $\pm$ .000 | .179 $\pm$ .002 | .301 $\pm$ .001 |
|          | 336  | .329 $\pm$ .001 | .415 $\pm$ .001 | .331 $\pm$ .000 | .417 $\pm$ .000 |
|          | 720  | .838 $\pm$ .005 | .690 $\pm$ .002 | .860 $\pm$ .001 | .698 $\pm$ .001 |
|          | Avg. | .358 $\pm$ .001 | .402 $\pm$ .001 | .363 $\pm$ .001 | .405 $\pm$ .001 |
| Weather  | 96   | .174 $\pm$ .000 | .212 $\pm$ .000 | .175 $\pm$ .001 | .215 $\pm$ .000 |
|          | 192  | .221 $\pm$ .000 | .255 $\pm$ .000 | .221 $\pm$ .000 | .255 $\pm$ .000 |
|          | 336  | .277 $\pm$ .000 | .295 $\pm$ .001 | .277 $\pm$ .001 | .296 $\pm$ .001 |
|          | 720  | .353 $\pm$ .001 | .348 $\pm$ .001 | .355 $\pm$ .000 | .348 $\pm$ .000 |
|          | Avg. | .256 $\pm$ .000 | .277 $\pm$ .000 | .257 $\pm$ .000 | .278 $\pm$ .000 |
| Solar    | 96   | .194 $\pm$ .005 | .229 $\pm$ .004 | .207 $\pm$ .000 | .246 $\pm$ .001 |
|          | 192  | .228 $\pm$ .002 | .256 $\pm$ .003 | .239 $\pm$ .001 | .270 $\pm$ .001 |
|          | 336  | .247 $\pm$ .006 | .276 $\pm$ .005 | .260 $\pm$ .001 | .287 $\pm$ .001 |
|          | 720  | .251 $\pm$ .003 | .275 $\pm$ .003 | .264 $\pm$ .001 | .291 $\pm$ .001 |
|          | Avg. | .230 $\pm$ .002 | .259 $\pm$ .002 | .242 $\pm$ .000 | .274 $\pm$ .000 |
| ECL      | 96   | .139 $\pm$ .001 | .235 $\pm$ .002 | .139 $\pm$ .001 | .233 $\pm$ .001 |
|          | 192  | .160 $\pm$ .002 | .254 $\pm$ .002 | .158 $\pm$ .001 | .249 $\pm$ .001 |
|          | 336  | .176 $\pm$ .003 | .271 $\pm$ .003 | .177 $\pm$ .001 | .271 $\pm$ .001 |
|          | 720  | .198 $\pm$ .003 | .292 $\pm$ .006 | .201 $\pm$ .003 | .293 $\pm$ .002 |
|          | Avg. | .168 $\pm$ .001 | .264 $\pm$ .001 | .169 $\pm$ .001 | .262 $\pm$ .001 |
| Traffic  | 96   | .378 $\pm$ .000 | .258 $\pm$ .000 | .378 $\pm$ .000 | .259 $\pm$ .000 |
|          | 192  | .393 $\pm$ .001 | .267 $\pm$ .001 | .399 $\pm$ .000 | .270 $\pm$ .000 |
|          | 336  | .399 $\pm$ .001 | .276 $\pm$ .002 | .416 $\pm$ .001 | .279 $\pm$ .000 |
|          | 720  | .437 $\pm$ .001 | .289 $\pm$ .002 | .456 $\pm$ .001 | .297 $\pm$ .001 |
|          | Avg. | .402 $\pm$ .000 | .273 $\pm$ .001 | .412 $\pm$ .000 | .276 $\pm$ .000 |

Table L.3: Results of TS forecasting over five runs - 3) Other datasets.
